# Supplementary material for: Genetic Diversity and Population Structure of Broomcorn Millet (Panicum miliaceum L.) Cultivars and Landraces in China Based on Microsatellite Markers
Source: PubMed Central journal article supplement (PMC4813230; doi:10.3390/ijms17030370), 2016-03-14
Supplement: ijms-17-00370-s001.pdf [file ijms-17-00370-s001.pdf]

# Supplementary Materials: Genetic Diversity and Population Structure of Broomcorn Millet (*Panicum miliaceum* L.) Cultivars and Landraces in China Based on Microsatellite Markers

Minxuan Liu, Yue Xu, Jihong He, Shuang Zhang, Yinyue Wang and Ping Lu

Table S1. Broomcorn millet varieties and landraces used in this study.

| No. | Population | Ecotype       | Name               | Pedigree                                                               |
|-----|------------|---------------|--------------------|------------------------------------------------------------------------|
| 1   | 1          | Northeast     | Longshu21          | Longshu5/Longshu9//Longshu10                                           |
| 2   | 1          | Northeast     | Longshu5           |                                                                        |
| 3   | 1          | Northeast     | Longshu10          |                                                                        |
| 4   | 1          | Northeast     | Longshu9           |                                                                        |
| 5   | 1          | Northeast     | Longshu23          | Longshu21/Longshu3//Longshu16////Longshu2//Xiaonangouheimizi//Longshu5 |
| 6   | 1          | Northeast     | Xiaonangou Heimizi |                                                                        |
| 7   | 1          | Northeast     | LLongshu12         |                                                                        |
| 8   | 1          | Northeast     | Longshu3           |                                                                        |
| 9   | 1          | Northeast     | Longshu16          |                                                                        |
| 10  | 1          | Northeast     | Longshu2           |                                                                        |
| 11  | 1          | Northeast     | Nianfeng5          |                                                                        |
| 12  | 1          | Northeast     | Nianfeng2          | Nianfeng2/unknown                                                      |
| 13  | 1          | Northeast     | Niangfeng2r        |                                                                        |
| 14  | 1          | Northeast     | Qishu1             | 62green1/unknown                                                       |
| 15  | 1          | Northeast     | Nianfeng7          | Unknown                                                                |
| 16  | 2          | Northeast     | Jiushu1            | Huangmizijiu58 system selection                                        |
| 17  | 2          | Northeast     | Panlong Huangmizi  | Unknown                                                                |
| 18  | 3          | Alpine Region | Yanshu7            | Yixuanhuangshuzi/Dabaishu                                              |
| 19  | 3          | Alpine Region | Jinshu6            | Unknown                                                                |
| 20  | 3          | Alpine Region | Yanshu8            | Unknown                                                                |
| 21  | 3          | Alpine Region | Jinshu8            | Erbaishu/8106-981-1//34-22                                             |
| 22  | 3          | Alpine Region | Jinshu4            | Neishu2/yishu1                                                         |
| 23  | 3          | Alpine Region | Jinshu5            | 981/Yishu1                                                             |
| 24  | 3          | Loess Plateau | Jinshu7            | Neimenghongshu/Shanxixiaohongshu                                       |
| 25  | 3          | Loess Plateau | Pinmi1             | Huangmizi system selection by mutation                                 |
| 26  | 3          | Loess Plateau | Jinshu1            | 8114-15-8/8106-983-3                                                   |
| 27  | 3          | Loess Plateau | Jinshu3            | Ziluodai system selection                                              |
| 28  | 3          | Loess Plateau | Ziluodai           |                                                                        |
| 29  | 3          | Loess Plateau | Jinshu2            | Tianzhenshuzi system selection                                         |
| 30  | 3          | Loess Plateau | Tianzhen Shuzi     |                                                                        |
| 31  | 3          | Loess Plateau | Jinshu9            | 8114-15-8/unknown                                                      |
| 32  | 3          | Loess Plateau | 8114-15-8          |                                                                        |
| 33  | 4          | Northwest     | Ningmi10           | Haiyuanziganhong/unknown                                               |
| 34  | 4          | Northwest     | Haiyuan Ziganhong  |                                                                        |
| 35  | 4          | Northwest     | Ningmi15           | Ziganhong/unknown                                                      |
| 36  | 4          | Northwest     | Ziganhong          |                                                                        |
| 37  | 4          | Northwest     | Ningmi5            | Unknown                                                                |
| 38  | 4          | Northwest     | Ningmi11           | Yu 6–14 system selection                                               |
| 39  | 4          | Northwest     | Ningmi13           | 70-1046/ZiganDariyue                                                   |
| 40  | 4          | Northwest     | Ningmi14           | Gugutou/62-02                                                          |
| 41  | 4          | Northwest     | Ningmi16           | Guyun5 system selection                                                |
| 42  | 4          | Northwest     | Ningmi17           | Gugutou/62-02                                                          |
| 43  | 5          | Northwest     | Longmi3            | Ganmi1/unknown                                                         |
| 44  | 5          | Northwest     | Ganmi1             |                                                                        |
| 45  | 5          | Northwest     | Longmi4            | XiyanbeiDahuangshu/Huiningdahuangmi                                    |
| 46  | 5          | Northwest     | Longmi5            | Yemizi/Benlanjidanqing//Fengshou-4                                     |

Table S1. Cont.

| No. | Population | Ecotype           | Name                  | Pedigree                           |
|-----|------------|-------------------|-----------------------|------------------------------------|
| 47  | 5          | Northwest         | Longmi7               | 8116-2-3-1/8428-1-1-2              |
| 48  | 5          | Northwest         | Longmi8               | 7814-11-1-2-3/Fu7705-4-4-2         |
| 49  | 6          | Loess Plateau     | Niuluandanmi          |                                    |
| 50  | 6          | Loess Plateau     | Yumi2                 | Shenmuhongmizi system selection    |
| 51  | 6          | Loess Plateau     | Shenmu Hongmizi       |                                    |
| 52  | 6          | Loess Plateau     | Yushu3                | Unknown                            |
| 53  | 6          | Loess Plateau     | Yushu2                | Unknown                            |
| 54  | 6          | Loess Plateau     | Yushu1                | Unknown                            |
| 55  | 7          | Loess Plateau     | Zigang Hongshu        | Landrace                           |
| 56  | 7          | Loess Plateau     | Zigang Hongshur       | Landrace                           |
| 57  | 8          | Mongolian Plateau | Yixuan Huangmi        | Zhunqihuangshuzi/unknown           |
| 58  | 8          | Mongolian Plateau | Zhunqi Huangshuzi     |                                    |
| 59  | 8          | Mongolian Plateau | Neimi5                | Neimi3/Yixuandahongmi              |
| 60  | 8          | Mongolian Plateau | Neimi3                |                                    |
| 61  | 8          | Mongolian Plateau | Yixuan Dahongmi       |                                    |
| 62  | 8          | Mongolian Plateau | Chimi2                | Neimi5/unknown                     |
| 63  | 8          | Mongolian Plateau | Yimi5                 | Niuluandanmi/unknown               |
| 64  | 8          | Mongolian Plateau | Neimi7                | Linhehuangmi/Zhunqihuangshuzi      |
| 65  | 8          | Mongolian Plateau | Linhe Huangmi         |                                    |
| 66  | 8          | Mongolian Plateau | Neimi6                | Daqiqingmizi/Helindahuangmi        |
| 67  | 8          | Mongolian Plateau | Daqi Qingmizi         |                                    |
| 68  | 8          | Mongolian Plateau | Helin Dahuangmi       |                                    |
| 69  | 8          | Mongolian Plateau | Heling Dahuangmir     |                                    |
| 70  | 8          | Mongolian Plateau | Neimi3                | Dangdidahuangmizi system selection |
| 71  | 8          | Mongolian Plateau | Dangdi Dahuangmizi    |                                    |
| 72  | 8          | Northeast         | Chishu1               | Dahongshu system selection         |
| 73  | 8          | Northeast         | Chishu2               | Dangdidabaishu/unknown             |
| 74  | 8          | Northeast         | Chimi1                | Huangmizi system selection         |
| 75  | 8          | Mongolian Plateau | Neimi1                | Unknown                            |
| 76  | 9          | Mongolian Plateau | Xiaobaishu            | Landrace                           |
| 77  | 9          | Mongolian Plateau | Xiaobaishur           | Landrace                           |
| 78  | 10         | Mongolian Plateau | Dongsheng Erhuangmi   | Landrace                           |
| 79  | 10         | Mongolian Plateau | Dongsheng Erhuangmir1 | Landrace                           |
| 80  | 10         | Mongolian Plateau | Dongsheng Erhuangmir2 | Landrace                           |
| 81  | 11         | Mongolian Plateau | Ziganhongmi           | Landrace                           |
| 82  | 11         | Mongolian Plateau | Ziganhongmir1         | Landrace                           |
| 83  | 11         | Mongolian Plateau | Ziganhongmir2         | Landrace                           |
| 84  | 11         | Mongolian Plateau | Ziganhongmir3         | Landrace                           |
| 85  | 11         | Mongolian Plateau | Ziganhongmir4         | Landrace                           |
| 86  | 11         | Mongolian Plateau | Ziganhongmir5         | Landrace                           |
| 87  | 11         | Mongolian Plateau | Ziganhongmir6         | Landrace                           |
| 88  | 11         | Mongolian Plateau | Ziganhongmir7         | Landrace                           |

1–10 were provided by Institute of Crop Science, Heilongjiang Academy of Agricultural Science; 11–15 were provided by Nenjiang Institute of Agricultural Science, Heilongjiang Academy of Agricultural Science, China; 16–17 were provided by Jilin Academy of Agricultural Science, China; 18–23 were provided by Institute of Gaohan Crop Science, Shanxi Academy of Agricultural Science, China; 24–32 were provided by Institute of Genetic Resources, Shanxi Academy of Agricultural Science; 33–42 were provided by Guyuan Institute of Agricultural Science, Ningxia, China; 43–48 were provided by Gansu Academy of Agricultural Science; 49–56 were provided by Yulin Institute of Agricultural Science, Shanxi, China; 57–88 were provided by Inner Mongolia Academy of Agricultural Science, China.

**Table S2.** The information of SSR primers used in this study.

| Primer Name | Forward Primer 1 (5'-3') Seq | Size | Reverse Primer 1 (5'-3') Seq | Size | Length |
|-------------|------------------------------|------|------------------------------|------|--------|
| F255        | CGGTAGAGAGAGCCAGCG           | 18   | CTCTTCCTCCTCCAGCTCCT         | 20   | 203    |
| F256        | GGGAACATGTTTAGGGGCTT         | 20   | TGGTTAATAGCCCCACAAGG         | 20   | 225    |
| F257        | CTCAAGGTGTGGGTGTGTGT         | 20   | TCGGAAATAAAAATAGGTTTGTACC    | 24   | 163    |
| F258        | GTGTCTCTTTCGTCTTGCCC         | 20   | GGGACACTTCCACCATCATC         | 20   | 204    |
| F259        | GTGCTTGACAAATCCGGTT          | 20   | CCACGCCTCCTGTA ACTACG        | 20   | 293    |
| F264        | GAGAAAGAGAGCGAGCGAGA         | 20   | CGAAAATAACCAACCGACCA         | 20   | 220    |
| F265        | GGCTTTGCTAGGGTTTCTCC         | 20   | GGTGTGAAGTTGCCAGATT          | 20   | 226    |
| F266        | GCTTCTTTTTATCCGAGGGG         | 20   | AGGGTATCCGGTGCTTAGGT         | 20   | 216    |
| F267        | GGGTACCCGGATGGTAGAT          | 20   | TCACTCGAGAATCATCACGC         | 20   | 283    |
| F268        | GCGATCGTAGTCGATAAGCC         | 20   | TCCTTGCTTGACATCACAT          | 20   | 287    |
| F269        | CGGAATGGGAGGAAGAGAAG         | 20   | ACCCTCCCTACCACCTCCTA         | 20   | 181    |
| F270        | TGCAACCCTCTTCCCTATTG         | 20   | TCCTCCACATCAGAACCACC         | 20   | 187    |
| F301        | AGGTCCGGTGTCTGTACCCTG        | 20   | ACTAGGTTGACCATGACGCC         | 20   | 289    |
| F302        | AATCAGTGCCTTGCTGCTTT         | 20   | GTAGGCAAGGCAGTTTCAGC         | 20   | 228    |
| F303        | AGGAATTGGATTCCCGAAAG         | 20   | TTCTCTCTCTACTCTCTCCCC        | 22   | 249    |
| F304        | GGGAAGAAGAAACACAAGCG         | 20   | ATCCAGGGAGCTCGAATCTT         | 20   | 187    |
| F305        | CCTTCCCTTGCTTCTCTCCT         | 20   | ACACACACACACACACACGG         | 20   | 235    |
| F306        | ACATGTTTCATGCATGTGGCT        | 20   | GCAGTCTGGTCCAAGAAAGG         | 20   | 230    |
| F307        | ATCACTGCTGTTTGGGGTTC         | 20   | GGTAGTGAGGAGTGCCGGTA         | 20   | 284    |
| F308        | ATGCATGGATAGAGGGCTTG         | 20   | TCCGTCCACTCTTCGTCTCT         | 20   | 232    |
| F309        | AGACGAACCGGGTCAGGTA          | 19   | AAAGCCTCTGCCTTCTCTCC         | 20   | 207    |
| F310        | ATAGAGCACCTGCTGAGCGT         | 20   | CCTTACATTTTTCTTTGTCCA        | 22   | 274    |
| F311        | TAGCCGCAGATTATCAGCCT         | 20   | ACACACACCACACACCACG          | 19   | 294    |
| F312        | AGGTGTGGTTTCTGGTCTGG         | 20   | TAGGGATCGTCCAATGCAAG         | 20   | 296    |
| F313        | CAGGCCATGATTCCTTTGTT         | 20   | ACGGTTCCTATTCCTCACGA         | 20   | 283    |
| F314        | GCCTCAAGATCGTCAAGCTC         | 20   | GTGTGCAAAACAAAGCCGAT         | 19   | 260    |
| F315        | GCCTCAAGATCGTCAAGCTC         | 20   | GTGTGCAACAAAGCCGATCT         | 20   | 259    |

Table S2. Cont.

| Primer Name | Forward Primer 1 (5'-3') Seq | Size | Reverse Primer 1 (5'-3') Seq | Size | Length |
|-------------|------------------------------|------|------------------------------|------|--------|
| F316        | TCTTTTATGCGCGTAAGGCT         | 20   | TCACTTGTAACCCCGGTAGC         | 20   | 297    |
| F317        | CAGTGTGGCTAAGGTGGGT          | 20   | GTAGCGCACGACATAACTGC         | 20   | 256    |
| F318        | ACAGTCCTGACGGCAAATTC         | 20   | CTCAAAGCGGTAAGGTCAGC         | 20   | 261    |
| F319        | TGCGGCTGGCTAGAATACTT         | 20   | ACGCGACGAACGAACAAC           | 18   | 230    |
| F320        | AAGAGATGGTGCGCTTGAGT         | 20   | ACCTGTAAGGCTGTCCCCTT         | 20   | 237    |
| F321        | AGCAGCCTAGGCCTCTTCTT         | 20   | CACACAACAACACACATACACACA     | 24   | 292    |
| F322        | CGGCCAGTGAGGAGTTACAT         | 20   | TCTTGATGGCATGACCTTTG         | 20   | 280    |
| F323        | TGACTAGCACTTGGGAAGGG         | 20   | GATTTTCAACACATGCACGG         | 20   | 223    |
| F324        | GGTCGCTCGTAATGTTTCGT         | 20   | GCAGGAGAGCTGCGTATCAT         | 20   | 237    |
| F325        | CGCGCTAAGTGTTGAGTGAG         | 20   | ACCTGTAAGGCTGTCCCCTT         | 20   | 173    |
| F326        | CCAGTCCTAGCTAAGGTGCG         | 20   | AATTCCCTACTCGGACTCCC         | 20   | 295    |
| F327        | TCCAGCTAGGGTCAGTCGAT         | 20   | TTCTAAATAGACACAAGAGACGTGC    | 25   | 183    |
| F328        | GCCGTAGGAGAGGTTGAGAG         | 20   | GCCTGTTTTTGTAGGCTGC          | 20   | 273    |
| F329        | AATGCCAGAGGAGTGGGTTA         | 20   | GAAACTTGGAAGGTGCTCCA         | 20   | 210    |
| F330        | GAGCATCCTTCTTGAGCTG          | 20   | GGCCAAAGCAAATGTCAAGT         | 20   | 237    |
| F331        | GTATGAGGTGTTGCTCGGGT         | 20   | TCTCACTTGTAACCCCGGTC         | 20   | 227    |
| F332        | GGTCGCTCGTAATGTTTCGT         | 20   | GCAGGAGAGCTGCGTATCAT         | 20   | 243    |
| F333        | TGGGTTAGGAGGTCAAGAGG         | 20   | TGCTCCAGTGTGCAACATT          | 20   | 186    |
| F334        | TGTCTAGACCATCGCCATCA         | 20   | CACTCACACACACATTTTCTTGG      | 23   | 218    |
| F335        | ATTGGACGAGTTACGGCTTG         | 20   | CATTGAGTGGGGTTGATCCT         | 20   | 191    |
| F336        | TCTTGTTCTGTACAGTTTGTATGGG    | 25   | ACCATTGGCCGATATTACCA         | 20   | 212    |
| F337        | AATGCCAGAGGAGTGGGTTA         | 20   | GAAACTTGGAAGGTGCTCCA         | 20   | 213    |
| F338        | TACGCGGGGTCTGTAGTAGG         | 20   | TCTCACTTGTAACCCCGGTC         | 20   | 203    |
| F339        | AGAGAGCGAGACAGACAGGC         | 20   | AGTGTGAGAAGGTGGGGTTG         | 20   | 213    |
| F340        | CCAGTTGGGAAAACCTCTCCA        | 20   | TTGTCGTTCTACTATGCACAC        | 22   | 180    |
| F501        | CACCAATCAACAACCTCGTGG        | 20   | TCGGAGTGGAAACGAAGTACC        | 20   | 239    |
| F502        | ACTTGGGTCCCTCCTCTTGT         | 20   | GTCTCTTGGGTGTGCACTGA         | 20   | 217    |
| F503        | GTGGTACAGCTGCTCGTTCA         | 20   | AGGAGGAACCAGGAAGCAAT         | 20   | 254    |

Table S2. Cont.

| Primer Name | Forward Primer 1 (5'-3') Seq | Size | Reverse Primer 1 (5'-3') Seq | Size | Length |
|-------------|------------------------------|------|------------------------------|------|--------|
| F504        | GCAAAGCCCACCAAATACAT         | 20   | GTTGTGTGGTGCCGTGATAG         | 20   | 253    |
| F505        | TGGCACACGTAACACGGTAT         | 20   | TCTGGACCTGCGAGCTTAAT         | 20   | 154    |
| F506        | TTAACCGAACAAAGGAGTGGG        | 20   | CTAAGCACTTGGGCGATG           | 18   | 167    |
| F507        | AGCAGCAGAACATGCACATC         | 20   | TGTCATTTTCATTTTAATTGGTAAAGT  | 27   | 162    |
| F508        | AGCGAATTTTCTTGCACTGG         | 20   | CGAGTTCCTTCAGGGTTGC          | 20   | 269    |
| F509        | TTCTTACGGAAGTTGGGGTG         | 20   | TTTCTAATTTGGTCATTTCGCAA      | 22   | 258    |
| F510        | GTGGTACAGCTGCTCGTTCA         | 20   | CAAGACAGGGAAGGAACCAA         | 20   | 268    |
| F511        | ATGGCACTTTTCAACGCACT         | 20   | TTTGTTTTGTTGTCGGCGT          | 19   | 167    |
| F512        | TTCTTACGGAAGTTGGGGTG         | 20   | TCAATTTGGTTCATTTCGCAA        | 20   | 261    |
| F513        | AAGGCTTAGGCCCATCAAGT         | 20   | CAAACGAGTTTGTTCGCTGTT        | 22   | 211    |
| F514        | TGGCACACGTAACACGGTAT         | 20   | TCTGGACCTGCGAGCTTAAT         | 20   | 159    |
| F515        | CGTTTTCTCGCTACACACGA         | 20   | TGGACAACGGAAAACGTACA         | 20   | 194    |
| F516        | TCAGCAAGATGCAAAAACGTC        | 20   | GATGCAGCTGGTGCTACTACT        | 21   | 150    |
| F517        | GCCACGCCACAGTTTTTAAT         | 20   | TTTGTTATTCTATGCATGTATTCGTT   | 26   | 202    |
| F518        | TTAACCGAACAAAGGAGTGGG        | 20   | GACGAGTTACGGCTGGTCAC         | 20   | 193    |
| F519        | CCCTCTCACACACACACGAG         | 20   | TAGTCCGAACGTGGACCAAT         | 20   | 248    |
| F520        | TCTTCTTACGGAAGTTGGGG         | 20   | CAATTTGGGTTATGTTCTTCTCG      | 23   | 167    |
| F611        | CAGGGAGTGGTGTGATCCT          | 20   | ATTGGACGAGTTACGGCTTG         | 20   | 180    |
| F612        | GCTTCCAACCTCAACTTGCC         | 20   | GCTAGGCATGTGCTCACGTA         | 20   | 264    |
| F613        | AGGCGGACCGAATTTTTACT         | 20   | CCATAACCAAGACATGAGCG         | 20   | 207    |
| F614        | CATTGAGTGGGGTTGATCCT         | 20   | AATGGACGAGTTACGGCTTG         | 20   | 181    |
| F615        | TCCATTCATCAGACCACAGC         | 20   | TGGGGAGTTGGGAGTAGTTG         | 20   | 177    |
| F616        | GCTCACAAAGATGACCCCAT         | 20   | TTTGTTTTCCCTCGCTCTTC         | 20   | 212    |
| F617        | AATGCAAACAACAGAAGGGG         | 20   | GGAGTGACCTCTCTCCCTCTC        | 21   | 192    |
| F618        | AGGCGGACCGAATTTTTACT         | 20   | GTGGCCGACGTCTGTAAGG          | 19   | 171    |
| F619        | CTGCTGCATGCCTTTACCTT         | 20   | CGCTGCAGTTTGGTCAGTA          | 20   | 252    |
| F620        | CATTGAGTGGGGTTGATCCT         | 20   | GCATTGGACGAATTATGGCT         | 20   | 180    |
| F621        | ATGAATCACCCGATCCACAT         | 20   | ACGCCAACATCAGCATATCA         | 20   | 209    |

Table S2. Cont.

| Primer Name | Forward Primer 1 (5'-3') Seq | Size | Reverse Primer 1 (5'-3') Seq | Size | Length |
|-------------|------------------------------|------|------------------------------|------|--------|
| F622        | CACTGTATTATCCTCCCCCG         | 20   | CCTGGCCTTGTTCTCATCTC         | 20   | 189    |
| F623        | TGAAAAACGAAGGGGATCTG         | 20   | ATTGGACTTACAACGGGGTG         | 20   | 265    |
| F624        | AGGTTTTTCAAACCACGCAC         | 20   | TGCTTGCTTCGTTTATGCG          | 20   | 203    |
| F625        | CACTGAGTGGGGTTGATCCT         | 20   | ACGAATTACGGCTTGGTCAC         | 20   | 179    |
| F626        | GTGGATGGCTGTGCCTTTAT         | 20   | TGTTTGTCTAACGGAAAATAGG       | 23   | 188    |
| F627        | TATCCACCAACGTGGGATTT         | 20   | CTACGGAAAGAGAGTGGCAGG        | 20   | 219    |
| F628        | GTGTAGCCAGGATCAGCCAT         | 20   | GCGGTAGATGGATTGAACGA         | 20   | 181    |
| F629        | AGGTTTTTCAAACCACGCAC         | 20   | CCGACTGTCTGTCTCCGTTT         | 20   | 183    |
| F630        | ATGAATCACCCGATCCACAT         | 20   | ACGCCAACATCAGCATATCA         | 20   | 211    |
| F631        | GTTTGGTCTCCTGCAAGCTC         | 20   | CGTGTCTTCGTTATGTGTCCC        | 21   | 279    |
| F632        | GCTGTCGGTCAGTCCTGTTT         | 20   | ACGCCAACATCAGCATATCA         | 20   | 161    |
| F633        | ACCCCATCCTTTCTCAAAT          | 20   | TTCGATGGCTAGCACACAAG         | 20   | 278    |
| F634        | TTTATTATCGCCGTCGTTCC         | 20   | CCTTCCTGCTGGCGTAGTAG         | 20   | 187    |
| F635        | GCACACGCATCATCACAAGT         | 20   | GCTCATTCAACGACAGATGC         | 20   | 280    |
| F636        | CCAAGCTTTATCGCTATCGG         | 20   | TGTGTGTGTGAGTGTCTGTGTG       | 22   | 196    |
| F637        | ATACCCGAAGCATTGAGTGG         | 20   | GTTTGGGTCTGAAGAATGTCA        | 20   | 169    |
| F638        | GCACACGCATCATCACAAGT         | 20   | CAACGACAAGATGCAAGACTG        | 21   | 275    |
| F639        | TTAACCGAACAAGGAGTGGG         | 20   | ACATAGCTAGCACTTGGGCG         | 20   | 179    |
| F640        | CTGGTACTCCCACAAGCGTT         | 20   | GTTTCCTTTTCGTCGTCTGC         | 20   | 237    |
| F651        | CGAAGCATGTTACTCCCCAT         | 20   | GACGGACGAGAGCATGTGT          | 19   | 204    |
| F652        | CGAAGCATGTTACTCCCCAT         | 20   | TGTGTGCGTACATATAATACGGTG     | 24   | 190    |
| F653        | CGATGAACGAAAATTCACCC         | 20   | GTTTATTTCGTTCAAATGCCT        | 20   | 258    |
| F654        | CGTTTTTCGAAAGGGTTTTTG        | 20   | TGTTTGGGTCTGAAGGAGTGT        | 20   | 216    |
| F655        | GCCACTTCCAATCACAATCC         | 20   | GGTTCGTATTTCGTTCAAATAGC      | 22   | 172    |
| F656        | CATTGAGTGGGGTTGATCCT         | 20   | ATTGGACGAGTTACGGCTTG         | 20   | 176    |
| F657        | AAGACGGCAGACATACAGGG         | 20   | CTCCGTACATTTTGTGGCCT         | 20   | 170    |
| F658        | CAATGAGTGGGGTTGATCCT         | 20   | GCATTGGATGAGTTACGGCT         | 20   | 183    |
| F659        | CATAGCTCACGGCACAACCTG        | 20   | CGTGTTCGGTACCCTACTT          | 20   | 197    |

Table S2. Cont.

| Primer Name | Forward Primer 1 (5'–3') Seq | Size | Reverse Primer 1 (5'–3') Seq | Size | Length |
|-------------|------------------------------|------|------------------------------|------|--------|
| F660        | TCGAACATGCAGGAAAAC TG        | 20   | TTTCCCTTTCAGGCAATCAG         | 20   | 164    |
| F691        | ACTCATGGTTACGGCAACTG         | 20   | GCGCGAGAGAGAGAGAGAGA         | 20   | 287    |
| F692        | CTCTGTGTTTGTGGGGGT           | 20   | GCAAGGACCTCTAATGCACC         | 20   | 235    |
| F693        | CCGACACTACTCTGCTTCCC         | 20   | GACAGCGGTTACCTTCCGTA         | 20   | 166    |
| F694        | CCTCCCGTCCTAGTGTACCA         | 20   | GTCACATTGTCACTGCGTCC         | 20   | 262    |
| F695        | GGCAATCGATGTAAGGTCAGA        | 21   | TCTTTGCAAATTTTCCGGTC         | 20   | 207    |
| F696        | AATTCAAAATTCCAGCACGG         | 20   | AGTAGGAGGAGGAGGGAGGG         | 20   | 189    |
| F697        | AGGACAGGCCATTTATGTTTG        | 21   | ACCTCCTACTGCGTTCGCTA         | 20   | 218    |
| F698        | GAGGTGAGAGACTTGACGGC         | 20   | GATCTACGGCCAGGAACACT         | 20   | 181    |
| F699        | AGTGCCCAATGACCAAAGAC         | 20   | GCGACTGGTACGTCCTTTTT         | 20   | 176    |
| F700        | CTGCTCTTTGGCTCTCTGCT         | 20   | GGTGGTAAGGTAGGTCCCGT         | 20   | 176    |
| F741        | GGACAGCAGCATA CAGGACA        | 20   | GTACGTCGACTTCCTACCGC         | 20   | 185    |
| F742        | AGTACCAACCCAGCATCAGG         | 20   | AAGGACAGGTCCATTTATGTTTG      | 23   | 267    |
| F743        | CCAGTTTGGGAGCAACAAGT         | 20   | GTTGAAGCTCAGGGAGAGGA         | 20   | 222    |
| F744        | AATAAATTGAAATCCACCCGC        | 21   | CTCTACTCTCTCCCTCCCTCC        | 21   | 223    |
| F745        | CGAATGTAGGTTGGGACTGG         | 20   | GAGCTCGTCTCCAACGAC           | 19   | 254    |
| F746        | CGTCCACCTTGGTGCTTATT         | 20   | GCTGATTTTCTAACGGCTGC         | 20   | 236    |
| F747        | TGAAAGGATGGGGAAACAAC         | 20   | CATTATACTCTCCGCTGCGT         | 20   | 195    |
| F748        | CAAGCCCATA CAATGCCTTT        | 20   | ACAAGATGGACAGGTGGAGG         | 20   | 168    |
| F749        | CAGTTGCCTCACCTTGCTC          | 19   | CCGCTCCTTACTCCTCTCCT         | 20   | 206    |
| F750        | AGTACCAACCCAGCATCAGG         | 20   | TTTCTACTAATTCCTTTCGTTGTTCA   | 26   | 247    |
| F771        | ACTGATGTGATCTAGCCCCG         | 20   | CCACCCAACGGAGTCATC           | 18   | 173    |
| F772        | GAGAGATCAGTGAGGACGGC         | 20   | ACCCCTCCGTACGCTACTAC         | 20   | 228    |
| F773        | AGCACACACGACGAGTTCAC         | 20   | ACCACAACCAACCACACACA         | 20   | 181    |
| F774        | GTTGCACCACACCAACACAT         | 20   | GTCCTCGCACGAAGACTACC         | 20   | 164    |
| F775        | TAGCCCGTAGTGCTCCA ACT        | 20   | CGACGGTTTCGTACTCTTCC         | 20   | 223    |
| F776        | GCGAGCTATACCTCTCACCG         | 20   | TGTGTAAGAGAGAGAAGAGTATGTGTG  | 27   | 160    |
| F777        | ACTCAGCGATTGTGTTGCTG         | 20   | ACGGAGTCATCATGTCGCTT         | 20   | 172    |
| F778        | TGACTGCAAAAAGGATGCTG         | 20   | CCAACCACCACTACTACGCC         | 20   | 201    |

Table S2. Cont.

| Primer Name | Forward Primer 1 (5'–3') Seq | Size | Reverse Primer 1 (5'–3') Seq | Size | Length |
|-------------|------------------------------|------|------------------------------|------|--------|
| F779        | TGGAGCAGCAACAAAACAAG         | 20   | TCGGTGGTACGGACTAGTGT         | 20   | 191    |
| F780        | CTGCATTCTCTGTTACCCA          | 20   | ATCCTTTCACTCGAGGGGT          | 20   | 250    |
| F781        | CGGCGAAAAAGCTCACTAAT         | 20   | CTTCCTTCCTTCCTCCTCC          | 20   | 246    |
| F782        | GTATCAAGCCGGAGAATGGA         | 20   | CCGTTACGTTTCGTTTCGTTT        | 20   | 235    |
| F783        | ACGTCGATGGTGCATAAACA         | 20   | TCGTCTCTCTACGTCTACTCTCTCT    | 25   | 177    |
| F784        | GCACTGGACCAGGTTTTTCAT        | 20   | TCTCTCTCTACTCTACTCTCTCTCGTC  | 27   | 204    |
| F785        | GCCATGTTGCTTGTTGACTG         | 20   | TCGTCCTACTCCTACCTCTCCTC      | 23   | 219    |
| F786        | CCTGGACACACACACACACA         | 20   | TCTTGTCACTGTCGGCGTAG         | 20   | 233    |
| F787        | TACCATTGTTAGGGCCTTGC         | 20   | CCTACCGATCTAGGTTTGCG         | 20   | 276    |
| F788        | ACAAAGAAGCGATGCGAGAT         | 20   | AATATCCGGCTTGACACAGG         | 20   | 172    |
| F789        | GGTGGGTGACAGTGCCTAG          | 19   | CTTGGAGGCCCAAACCTAGT         | 20   | 239    |
| F790        | AGATTGGATTTGAAGGGGCT         | 20   | TTCACCCAAAGATCATCACG         | 20   | 271    |
| F831        | GTTACAGGAGCGCGAGAGAG         | 20   | TATAAAGGAAGAACGGGGGC         | 20   | 154    |
| F832        | AGCTGTGGAAGAACGGAAGA         | 20   | CAGAACTAGCGCAAACAATGA        | 21   | 210    |
| F833        | AGGCAAGTCATCCTTGGCTA         | 20   | CGTTCTCCGTTGAGAGGAAG         | 20   | 238    |
| F834        | AGCCACCGCTAGAATGCTTA         | 20   | CCCACACAAGGAATACCCAT         | 20   | 193    |
| F835        | CACGAGCCCAGAAGTCCTAC         | 20   | TTGGTACCGCAATACGTGTC         | 20   | 275    |
| F836        | GCGCAGTAATATATTTTCAGTAATTCA  | 26   | GCATCATCGTCAAGACCTCA         | 20   | 225    |
| F837        | GCAAGCAGGGTAGGAATGAC         | 20   | CTACGCTCCCTCCAAGACAG         | 20   | 159    |
| F838        | AGCTGTGGAAGAACGGAAGA         | 20   | ATCTGTTCATTGGGAAACGC         | 20   | 249    |
| F839        | CGGACTAGCCAAGGAGACTG         | 20   | GGAACGCACTGCATAGCATA         | 20   | 242    |
| F840        | GCCATTGCCACTGATCTCTT         | 20   | CGTTCTCCGTTGAGAGGAAG         | 20   | 202    |
| F841        | ATTGGACGAGTTACGGCTTG         | 20   | TTATTCGCTATCGGACTCCC         | 20   | 155    |
| F842        | CTCGTCTCCTCCCTCCCTCT         | 20   | CCAACCTCACCCTCCACTC          | 20   | 168    |
| F843        | CGTAGGACGACTGACTGTGC         | 20   | CGACCCACGATAAGGAAGTC         | 20   | 156    |
| F844        | CCTATGTCCAGTCGGGGTTA         | 20   | ACCACGAACACAAGAGAACG         | 20   | 233    |
| F845        | GCGCAGTAATATATTTTCAGTAATTCA  | 26   | GCATCATCGTCAAGACCTCA         | 20   | 226    |
| F846        | TAGTTGATGCGTCTCGTGCT         | 20   | GGCAGATCCCCTACTCATCA         | 20   | 223    |
| F847        | TCTTTTATGCGCGTAAGGCT         | 20   | CGAGATAGGGACGTCAAAAAG        | 21   | 262    |



Table S2. Cont.

| Primer Name | Forward Primer 1 (5'-3') Seq | Size | Reverse Primer 1 (5'-3') Seq | Size | Length |
|-------------|------------------------------|------|------------------------------|------|--------|
| F848        | AGCTGTGGAAGAACGGAAGA         | 20   | TCAGAACTAGCGCAACAATGA        | 21   | 216    |
| F849        | CCTATGTCCAGTCGGGGTTA         | 20   | CACGAACACAAGAGAAGTAGCTC      | 23   | 232    |
| F850        | GCGCAGTAATATATTTTCAGTAATTCA  | 26   | GCATCATCGTCAAGACCTCA         | 20   | 227    |
| F1031       | CGTTCCTTCTTTTGTTTGTACG       | 23   | CGCAGCAGCAGGGAGTAT           | 18   | 154    |
| F1032       | GGCCCCTGAGATAGAGGACT         | 20   | CGGGGTCGTATAGTAGGGGT         | 20   | 156    |
| F1033       | AACGCAACACGAACACACAT         | 20   | TCTTCCTTCTACCCGTCGC          | 19   | 216    |
| F1034       | AAACACAAGCCGAATTGTCC         | 20   | ATCGCCTGTCAATTTCTTGG         | 20   | 214    |
| F1035       | CTGAAACGTTCAAGTGGGGTT        | 20   | AGCACTTGGGTAAGTAGGAGTG       | 22   | 174    |
| F1036       | CAGAGCAGTGCAGTATTGTG         | 20   | TCGTTTGTGTTTCGGTTGTC         | 20   | 232    |
| F1037       | GAGACGCCTTTCTCAACCAG         | 20   | TTCGATTTGTCTCGCTTCT          | 20   | 196    |
| F1038       | ATTCAGCGGCATAATCCATC         | 20   | CTTCTCGCACAAAGACCACAA        | 20   | 261    |
| F1039       | AAACACAAGCCGAATTGTCC         | 20   | GTGTCTCTTGCCCTCGCTT          | 19   | 187    |
| F1040       | TTAACCGAACAAGGAGTGGG         | 20   | TACGGTCGTTGGTTCGTACA         | 20   | 196    |
| F1061       | GGGAACACGAACACATGGTA         | 20   | CAGTGATGATCCTGGATGGA         | 20   | 264    |
| F1062       | GCCACGCCACAGTTTTTAAT         | 20   | CGTGTGTATATTTTGTATTCTATGC    | 27   | 218    |
| F1063       | GCATCGTTTTCTCTTTCCA          | 20   | CTCCTCGTCTCTCCCTCCTC         | 20   | 257    |
| F1064       | CTGTCGTTGCTTCCCTTCTC         | 20   | TCCCTTTCCCTTTTCTTTT          | 20   | 240    |
| F1065       | TCTGGACATGCTTTCAACCAG        | 20   | CCTACCTCGTAACTGCGG           | 20   | 267    |
| F1066       | GCATCGTTTTCTCTTTCCA          | 20   | GTCTCCTCCCTCCCTCCTC          | 19   | 255    |
| F1067       | ATCGACGACTAGGCCCTGTA         | 20   | TGCGGAGTGTCTTTGTTCTG         | 20   | 199    |
| F1068       | CTGTCGTTGCTTCCCTTCTC         | 20   | ACGGTTAGTCGACGCGAG           | 18   | 180    |
| F1069       | GGGCATGTGCTTTTTTCTCAT        | 20   | ATAGGTAGGAGGCGATGTGC         | 20   | 181    |
| F1070       | GTGTTGATCTGCACCCACC          | 19   | CGAGCATTTTCATGGAGATCA        | 20   | 182    |
| F1071       | ATCGACGACTAGGCCCTGTA         | 20   | TGTATGGAAAGCTCTGGCCT         | 20   | 159    |
| F1072       | TCTGGACATGCTTTCAACCAG        | 20   | TACCTGTAACACTGCGGCTG         | 20   | 266    |
| F1073       | ATGATGTGATCTGGCTGACG         | 20   | CGCTTCAATACGTTGTCCTG         | 20   | 236    |
| F1074       | TCTGGACATGCTTTCAACCAG        | 20   | CACTGCCTGATCCTACCCTC         | 20   | 286    |
| F1075       | CCATCACAATGCGAACTTCA         | 20   | GGGAGTCTATCCTCGACATACG       | 22   | 182    |
| F1076       | TACGTCAACGATACCTGCCA         | 20   | GGCGACAGTAGGTGCTCAAT         | 20   | 182    |

Table S2. Cont.

| Primer Name | Forward Primer 1 (5'-3') Seq | Size | Reverse Primer 1 (5'-3') Seq | Size | Length |
|-------------|------------------------------|------|------------------------------|------|--------|
| F1077       | CCAGCCATTGTCCTATTCTGA        | 21   | GTGTGCTCTGGCCTTTTCTC         | 20   | 217    |
| F1078       | TACATCGATGCCAATGGAGA         | 20   | TAGAGGGAGGTTGGTCGATG         | 20   | 175    |
| F1079       | CGAGACGCTAAAAGGTGAGG         | 20   | TTCTTCCTTCCCTACCTAACTAAC     | 25   | 261    |
| F1080       | ATCGACGACTAGGCCCTGTA         | 20   | GGCCGTCACTATATCTGTCACC       | 22   | 153    |
| F1371       | CACCCACCAAACAACACAG          | 20   | CCTAGATCTCGCTCTGGAGG         | 20   | 250    |
| F1372       | TGGAGTAGCAGAGAGGGAGC         | 20   | GGAAAAGAGGTTTGGGGAAG         | 20   | 264    |
| F1373       | TGTAGCTGCACCGGAATATG         | 20   | TCTCTCTCTCTCGCCCTG           | 20   | 291    |
| F1374       | CTCTGACCGCATCTGAAACA         | 20   | TTAGACAGCCAGCCACTTCA         | 20   | 297    |
| F1375       | CGTTGGTTGCTTGACAAATG         | 20   | TGTAGGTGCTGGAGCTTGTG         | 20   | 201    |
| F1376       | TTACTTGTAGGCGACCGACC         | 20   | ATGATGGGGTGTACGCAGTT         | 20   | 172    |
| F1377       | TCAGCACATTTCTGACCAGC         | 20   | TCCGACCCTACGTCGTA ACT        | 20   | 140    |
| F1378       | TTTGACTCATCATCTCAAGTATCCA    | 25   | TGTGTGTGAGTGTGTATGTGTGTG     | 24   | 119    |
| F1379       | TTTGACTCATCATCTCAAGTATCCA    | 25   | TGTGTGTGAGTGTGTATGTGTGTG     | 24   | 120    |
| F1380       | GCCTCCTGTCTTGTAGCGTC         | 20   | AGGGTAGGCTGAGAGCCTGT         | 20   | 121    |
| F1381       | TTCTCTCTCTCCCAGTCTCCC        | 21   | AACGGTGTTCCTCAAAGACAC        | 20   | 147    |
| F1382       | TCCATGTAAAGGCTCTCGCT         | 20   | CTGAGGTCCTTTGACGAAGC         | 20   | 155    |
| F1383       | AAAGGAACAGAAGCAAAGCG         | 20   | TTGCCTTTTGGAAGCTGTCT         | 20   | 116    |
| F1384       | TGGAAACTCCATGGACAACA         | 20   | AGTCTGACTCGGTCGTCTCC         | 20   | 252    |
| F1385       | TCAACGTTTCTAGCTTGCCA         | 20   | GTGCATTGTTTATGATTGGG         | 20   | 141    |
| F1386       | ATATCAAATTGCGGCACACA         | 20   | CCGTACGTCTCTCGTTCTTTG        | 21   | 130    |
| F1387       | TTTCAGGGACTGGACTGGAC         | 20   | GTAGGGGGTAGCTGAGAGCC         | 20   | 105    |
| F1388       | TGGGTGCGAGTACTACCAGTT        | 21   | AAGACCTGCAGGAGCTTCAC         | 20   | 101    |
| F1389       | TTTTATCAGAGGCAATCCCG         | 20   | ACCAGTGCATCGAATGTTC A        | 20   | 287    |
| F1390       | GCAGTCGTGCCTCTCCTTTA         | 20   | GGGAGAGAGAAGTGAGATGGG        | 21   | 118    |
| F1391       | CAGAAGGCTTTGGGAGACTG         | 20   | CCTCCCTCCTGTGTTACGTC         | 20   | 206    |
| F1392       | CTGGACCCACAATGAGCTTT         | 20   | ACTCAGTAATCACGCGTCCC         | 20   | 182    |
| F1393       | ACCCCTTGAAGTGCACAAAC         | 20   | CGCTGCCATGTAGAGACAGA         | 20   | 151    |
| F1394       | TATCCCCCTTTCCAAGCTCT         | 20   | GCACAGCACAGCACAAA ACT        | 20   | 193    |
| F1395       | GAGCCACCATCAACCCTTTA         | 20   | AAATCTCCGGTGAGAAATCG         | 20   | 240    |

Table S2. Cont.

| Primer Name | Forward Primer 1 (5'-3') Seq | Size | Reverse Primer 1 (5'-3') Seq | Size | Length |
|-------------|------------------------------|------|------------------------------|------|--------|
| F1396       | GTGGGATGTGTAGCCGAGTT         | 20   | GGAGCAGGTGTGGATACGTT         | 20   | 288    |
| F1397       | GATCCACCTCTCTTCCCC           | 20   | AGAGAGACCCAAGACCTCGC         | 20   | 152    |
| F1398       | GTCACGGCGTGTGTGTAT           | 20   | GTGTGGGTGTGGTTCTTGC          | 19   | 300    |
| F1399       | TCTCTAGGGTGGATGGATGG         | 20   | TAGGTGAGGGGTGGTACTGG         | 20   | 150    |
| F1400       | AGCAACGGAGGTGAGAGAGA         | 20   | TCGACACACACGACACACAC         | 20   | 128    |
| F1421       | CGCTTAGCACAAAGTGGTGA         | 20   | CCACCCATAAAAATCCCACAC        | 20   | 173    |
| F1422       | CTGGTCTTCGAGCTCGTCTT         | 20   | CATTCCCAAACATATTCCCG         | 20   | 215    |
| F1423       | GCCTCCTTAAGGCTACACCC         | 20   | CAAGCAAACCACGAGAGTCA         | 20   | 192    |
| F1424       | AGTACCAACCCAGCATCAGG         | 20   | AAGGACAGGCCTATTTATTGTTG      | 24   | 274    |
| F1425       | GGTGAGATTGGAGTTGCCAT         | 20   | CATTCCCAAACATATTCCCG         | 20   | 269    |
| F1426       | GCTCAGATCCCCATCAGTGT         | 20   | CTCTGACACTCTTACCCGCC         | 20   | 293    |
| F1427       | AAAACATGACGGGTCTGTC          | 20   | ACGGAAGATTGTGTTGGTCC         | 20   | 238    |
| F1428       | AGGAGGGTCGTAGCAAGGAT         | 20   | TGAAAAACTTCCTCGCCAAC         | 20   | 236    |
| F1429       | AATATCCCTTTTGTGCGACG         | 20   | ATGCATTGATGGGCTTGATT         | 20   | 181    |
| F1430       | TTAACTAGCCGTGCATCCC          | 20   | CGTCGTTCTCCACTCATT           | 20   | 230    |
| F1551       | TGCATGTCGCACACTGAATA         | 20   | ACGCAGGAGAACTGCGTATC         | 20   | 149    |
| F1552       | ACCCTACTTGCGGGAAAAGT         | 20   | TATAGCGCAAGGCACAACCTG        | 20   | 178    |
| F1553       | ATTGACCTGTGACCTCGCT          | 20   | AGGGCTCTCGAGGAGTGTT          | 20   | 195    |
| F1554       | CCTGAACGGAGAGTCGTAGC         | 20   | GTGGAGCAAGAAAGGAGCTG         | 20   | 253    |
| F1555       | AGCATTCTCCATGCGTCTTT         | 20   | GGTTTAGTTGCCTACTATGGTGGT     | 24   | 191    |
| F1556       | TTGTCGGCATGGTTCTGTAA         | 20   | TCTCGGACGAAAAGGACAAT         | 20   | 212    |
| F1557       | CATTGGACGAGTTACGGCTT         | 20   | GATTTTCAACACATGCACGG         | 20   | 255    |
| F1558       | ACTAGCACTTGGGCATGGTT         | 20   | GAAACAATGGAGTGGGGTTG         | 20   | 157    |
| F1559       | GGAAGGCCATGTGTTCAAGT         | 20   | CGGACTGAAACCAGTTCACA         | 20   | 215    |
| F1560       | AGAATCCCGAGACAAACTCG         | 20   | CCCTCCAGCAGCTCTACT           | 20   | 155    |
| F1561       | GCCATTGCCACTGATCTCTT         | 20   | CGTTCTCCGTTGAGAGGAAG         | 20   | 195    |
| F1562       | CCAAAAGAGAGTGGCAGGAG         | 20   | AAGGACCGTCCCCTTGTACT         | 20   | 140    |
| F1563       | CGGCCTACTGCCTAGTCATC         | 20   | TTGAGGTGTCAACGGATTCA         | 20   | 193    |
| F1564       | AGAAACGCAGAGAGAGCGAG         | 20   | TTGGTCAGCAAAGGACACAC         | 20   | 182    |

Table S2. Cont.

| Primer Name | Forward Primer 1 (5'-3') Seq | Size | Reverse Primer 1 (5'-3') Seq | Size | Length |
|-------------|------------------------------|------|------------------------------|------|--------|
| F1565       | GAATCCTGGCCTTGTTCTCA         | 20   | TGGCCTGACGAGGAGAATAG         | 20   | 283    |
| F1566       | CGAGAAAACCTCTGTCTCACACAC     | 23   | GATTGGTTCTTCTCGTTGCC         | 20   | 143    |
| F1567       | CAATATCTCGTAAGGTACTCATGTGG   | 26   | TAACCCAAAGATTTGACGCC         | 20   | 223    |
| F1568       | ATGCGTAGGAGGACATGAGC         | 20   | TAGTAGGAGCCAGGAGGTGG         | 20   | 218    |
| F1569       | CGGCCAGTGAGGAGTTACAT         | 20   | CAGGAGAGCTGCGTGTTCAT         | 19   | 233    |
| F1570       | TCATTTTCGACCATGCAAATA        | 20   | TCACACACTCGCACACACAC         | 20   | 249    |
| F1601       | GACTTTTGCTGGCAAGTTCC         | 20   | TGAATCTCCAAGCTGCAATG         | 20   | 158    |
| F1602       | TACGCGGGGTCTGTAGTAGG         | 20   | GGGACGTCTCTCAAGCCAC          | 19   | 144    |
| F1603       | ATTGGACGAGTTACGGCTTG         | 20   | TAGCACACGGCACAACTAGC         | 20   | 120    |
| F1604       | GTCCGTAGGTCGTCCCTTGT         | 20   | CAAACAACACATACACAACTCA       | 24   | 215    |
| F1605       | TGAAAACAAGCCCGAGTTC          | 20   | AGAGTTCACGACGCCTTCTC         | 20   | 265    |
| F1606       | AGCCACCGCTAGAATGCTTA         | 20   | CCCCTCCACTCCTCGTCTA          | 20   | 179    |
| F1607       | GACGTGAGACCTGTCTTGGG         | 20   | TCACCTACGCTCTTGTGACG         | 20   | 167    |
| F1608       | CACACGGGGTTTAGACTGGT         | 20   | ACTAAAAGGAAGAACCGGGG         | 20   | 246    |
| F1609       | GGCATGTTATTTGCAAGGTG         | 20   | GCCTTTGCGTTGCTACAGAT         | 20   | 219    |
| F1610       | GACCCAGCGATCAGTCTCTC         | 20   | CTCTTGTCGTCTTGGTCCGT         | 20   | 205    |
| F1611       | TTCTACCCCCTCGTTTGTG          | 20   | TGCGGTATTGTGATCGAAGA         | 20   | 226    |
| F1612       | ACGAATTACGGCTTGGTCA          | 20   | TTATTCGCTATCGGACTCCC         | 20   | 157    |
| F1613       | AGGCAAGTCATCCTTGGCTA         | 20   | CGTTCTCCGTTGAGAGGAAG         | 20   | 243    |
| F1614       | AGCCACCGCTAGAATGCTTA         | 20   | CCTCGTCTACACATCCTTTTCC       | 22   | 169    |
| F1615       | CTGATGCAGCTGGTGCTACT         | 20   | CAGTCAGCAAGATGCAACGTA        | 21   | 150    |
| F1616       | TTCTACCCCCTCGTTTGTG          | 20   | ATTGTGATCGAAGACTCGGG         | 20   | 224    |
| F1617       | GCATTGGACGAGTTACGGAT         | 20   | TTATTCGCTATCGGACTCCC         | 20   | 156    |
| F1618       | AAAAATTTGGCCTCACATGC         | 20   | TACAGACTGGTCCTGGCCCT         | 20   | 217    |
| F1619       | CGCTGGAATGCTTAGGAAAT         | 20   | TTTCTTTTCGTAACCCACG          | 20   | 157    |
| F1620       | CTGATGCAGCTGGTGCTACT         | 20   | CAGTCAGCAAGATGCAAACG         | 20   | 152    |
| F1621       | AAAAATTTGGCCTCACATGC         | 20   | TACAGACTGGTCTGGCCCTT         | 20   | 218    |
| F1622       | GGTCATGTGAGTCGATAAAGCA       | 22   | TGGGTAAACGGACAGTTGTG         | 20   | 168    |
| F1623       | ACTACGTCAGCCCCATGAAC         | 20   | TCCTTTACCTACCTACGGACG        | 21   | 247    |

Table S2. Cont.

| Primer Name | Forward Primer 1 (5'–3') Seq | Size | Reverse Primer 1 (5'–3') Seq | Size | Length |
|-------------|------------------------------|------|------------------------------|------|--------|
| F1624       | CTGATGCAGCTGGTGCTACT         | 20   | CAGCAAGAATAGCAACGACTAAGA     | 24   | 153    |
| F1625       | ACCCAACCGTATATCCAACG         | 20   | TGTCACAGTTGTCCTGGCAT         | 20   | 274    |
| F1626       | ATTGGACGAGTTACGGCTTG         | 20   | ACGACGACGACGTACCTACC         | 20   | 154    |
| F1627       | GTTCCAAGGACGTGTGTGTG         | 20   | GTCGTACGGTTGTCGTCGTA         | 20   | 131    |
| F1628       | CATTGGCCGCCATAGAGTAT         | 20   | AACTAATAGTACGTACGACGCGA      | 23   | 158    |
| F1629       | ATAGGCAGGTGGTCGATACG         | 20   | CGACGTACTTACGGTTCGTACTACT    | 25   | 221    |
| F1630       | TAGGAGTTCTCGCACCGACT         | 20   | CTAACCGTAACCGTACCGGA         | 20   | 194    |
| F1671       | CGCACCGGTAATAAGGTGAT         | 20   | TAGTAACCGAGCAAGGGGTG         | 20   | 288    |
| F1672       | ATTTGACCTGTGACCTCGCT         | 20   | CCTTTCTGTTTCTGCAAGCC         | 20   | 215    |
| F1673       | AGCATTCTCCATGCGTCTTT         | 20   | AGCACATAAAGCCTCCCTGA         | 20   | 263    |
| F1674       | TCATGGCAGCACACTCTTTC         | 20   | CCAATCACTAACCACAAGACCA       | 22   | 117    |
| F1675       | CTGGGTGTAGAATATCGCGG         | 20   | ACATCCTCAGCCCAATCAAC         | 20   | 283    |
| F1676       | CTCGATCGATCAGGTTTTGG         | 20   | GCTCGACTTGGCGATTAAGA         | 20   | 249    |
| F1677       | GGTGCAACAAACCTAGCTCC         | 20   | TCCCAAAATCCCTCATCAAG         | 20   | 190    |
| F1678       | ACCCTCCAGCTTTCCATCTT         | 20   | TCTGAAGAATACACACGCGG         | 20   | 230    |
| F1679       | GGGGGTACGGACATAGTTGA         | 20   | GAGCGCGAGAAGAAAGAAGA         | 20   | 199    |
| F1680       | CACATTTCAAATAACCTTCGTCTC     | 24   | TGTTGTTCCGGGAGGAATAGG        | 20   | 288    |
| F1701       | TGTTTCGGTCCCAACCTTAG         | 20   | GAGGGTGAAGAGATTAGGGAGA       | 22   | 241    |
| F1702       | GCTTAGCTTCTGTCCGATCG         | 20   | TGATCTAGCCCATCAGGTC          | 20   | 174    |
| F1703       | CAACAAGGTTGGTTGGCTTT         | 20   | ATGCTGCTGCAGATGTTTTG         | 20   | 166    |
| F1704       | GGCCTGGTATTTGTAGCAGC         | 20   | CCAGTGAATCCCCTGTTGTT         | 20   | 227    |
| F1705       | CGATCCTACTACCTACCGGC         | 20   | AAAGACGAAGGAAGACAGCG         | 20   | 147    |
| F1706       | ATCCTCCATTGCTGTCCAAG         | 20   | AAGTGCCTTGTGCCTTTGG          | 20   | 157    |
| F1707       | ATTGCGGCAACCTTTTTATG         | 20   | GTCTTCGAGTGAGAGGACCG         | 20   | 148    |
| F1708       | ATCCTCGAGAGCATGAAGGA         | 20   | GGGTAGTAGGTAGGGAGCCG         | 20   | 259    |
| F1709       | CTTCGACTCCACTTGCCTTC         | 20   | GCAGCTAGGATGCTTGAAT          | 20   | 170    |
| F1710       | GTTCTGCTCTGCTTGGCTCT         | 20   | CTCCCCTGATTATTGGCAGA         | 20   | 214    |
| F1751       | CCAGCTTATCAGCCACTGGT         | 20   | GGGCGTTGTTGTTCTATCGT         | 20   | 261    |

Table S2.Cont.

| Primer Name | Forward Primer 1 (5'-3') Seq | Size | Reverse Primer 1 (5'-3') Seq | Size | Length |
|-------------|------------------------------|------|------------------------------|------|--------|
| F1752       | GCGTGAAGTAGCGATGAGGT         | 20   | ACGCCGTGCACAATACTTTC         | 20   | 234    |
| F1753       | CCCAATGCAAGTGAGATGTG         | 20   | TTCTCCAAAATTAGCGGTGG         | 20   | 219    |
| F1754       | TTCGATGGCTAGCACACAAG         | 20   | TTTCTCTGCCTCTCGAATCC         | 20   | 214    |
| F1755       | ATCAGTCACGCACAGGTTTG         | 20   | TCGTTGACCACCTTTCTCCT         | 20   | 147    |
| F1756       | CGACGACCAAATTTTGCTTT         | 20   | TTGCTGTTTGTCAATCCCAG         | 20   | 160    |
| F1757       | TTCGATGGCTAGCACACAAG         | 20   | TTTCTCTGCCTCTCGAATCC         | 20   | 218    |
| F1758       | TGTTTCTATCTGGCCCCCTG         | 20   | CGATCCCTCGCAAGGTTAC          | 19   | 161    |
| F1759       | TCAGGTCTCTGAACATCCCC         | 20   | GGTAGCCAGGATCAGCCAT          | 19   | 158    |
| F1760       | TGTGGGAGAGAAGTGGGC           | 18   | CAAGGAAGGAATAAACCGCA         | 20   | 187    |
| F1761       | GAGATGGTGCGGATTCTGAG         | 20   | TCATTTCCACTGTCCTGCC          | 20   | 146    |
| F1762       | TTGCAAGTAAGGTCGAAATTGA       | 22   | CACGTCAACCAAATAACGCA         | 20   | 242    |
| F1763       | TCAGGTCTCTGAACATCCCC         | 20   | GTGTAGCCAGGATCAGCCAT         | 20   | 158    |
| F1764       | CTGAGGTGTCTCTTGCCCTC         | 20   | GTCCCACTGCGTTGAAAAAC         | 20   | 158    |
| F1765       | TTTCTATATTGTAACGACCGTGG      | 24   | TGATGAGAGCATCGTCGTTC         | 20   | 237    |
| F1766       | AAGATGAACAGAACCGCAGG         | 20   | AACAACGCTGCAACAACAAC         | 20   | 163    |
| F1767       | TTGGGTTGTGTGCTTCATGT         | 20   | CTCCTCCTCCTCTCGAGGTC         | 20   | 149    |
| F1768       | TGCTCATTGCACACACTACG         | 20   | TGTTTTGTTTGGTTCGTTTCG        | 20   | 155    |
| F1769       | AAGAGTCCTTCAACTGCCCA         | 20   | CGTAGTACGTCCGACGAAAG         | 20   | 222    |
| F1770       | CTCGATCGCCTTTCTTCCTT         | 20   | GTACGTACGACCGACCGA           | 18   | 152    |
| F1901       | TGCTCTAGTTGCAGTGGTGC         | 20   | AGTCGTTTCTACCCCTCCGT         | 20   | 275    |
| F1902       | AGGGTAAACAAGAACGCACG         | 20   | ATGTCTCCTCGTTATTGCGG         | 20   | 236    |
| F1903       | AGTTAACCCCTGTGATGCC          | 20   | TCTGGTTCATGCGTCTAACTG        | 21   | 217    |
| F1904       | TTAACCGAACAAGGAGTGGG         | 20   | AAACCTAATCCGGTAGCCGT         | 20   | 240    |
| F1905       | TTAACCGAACAAGGAGTGGG         | 20   | ATTGGACGAGTTACGGCTTG         | 20   | 206    |
| F1906       | GAGACGCCTTTCTCAACCAG         | 20   | GATTCGATTTGCTCGCTTTC         | 20   | 205    |
| F1907       | AGCTGATATCTCAGGACGGC         | 20   | CAATTAGGTTTCGTAACGGTAGAGG    | 24   | 252    |
| F1908       | AGTTAACCCCTGTGATGCC          | 20   | CGTTGTTGGTCTTCTGGTT          | 20   | 233    |
| F1909       | TGCAACTTCGAGTTGTTTGG         | 20   | TTGGTAACGTCCACGTGTGT         | 20   | 246    |

Table S2. Cont.

| Primer Name | Forward Primer 1 (5'-3') Seq | Size | Reverse Primer 1 (5'-3') Seq | Size | Length |
|-------------|------------------------------|------|------------------------------|------|--------|
| F1910       | CATGCATAGGCTCGTTTTCA         | 20   | GAGTGGAGTGGTTACGGGTG         | 20   | 241    |
| F1931       | TCCAAGAAAGGGAAAAACGA         | 20   | CGAGTTCTTCTCAGGGTTGC         | 20   | 285    |
| F1932       | TGGCGCTAACCTCTTGTTCT         | 20   | ATTGTCCTATCACTTGCGCC         | 20   | 291    |
| F1933       | TGCTTCACGGATGTTCTCTG         | 20   | GCAGATCAAACCAATAGGGC         | 20   | 232    |
| F1934       | TCTGCTCTTCAAATGGGCTT         | 20   | GTGTGCATCTCTCCGAGTCA         | 20   | 208    |
| F1935       | GATTTTCAACACATGCACGG         | 20   | GTCAAAGGCATTGGACGAGT         | 20   | 261    |
| F1936       | ACACATGCAGGGGATCATT          | 20   | ATTGGACGAGTTACGGCTTG         | 20   | 238    |
| F1937       | CTAGAGACTTTCATCGCCGC         | 20   | ATAAGCAACCGAGCAGAGGA         | 20   | 242    |
| F1938       | ATTTGGTGCCCAAGAAATGA         | 20   | ACCAGCAGCCATTGAATCTC         | 20   | 200    |
| F1939       | CATAGCTCACGGCACAACCTG        | 20   | TATGGTGGGTAATGGCGTTT         | 20   | 245    |
| F1940       | GCAGTGGGTCAGCTTATGGT         | 20   | TCTCTCTGTGTGTGCGTG           | 20   | 210    |
| F2011       | ACACATGCAGGGGATCATT          | 20   | ACGAATTACGGCTTGGTCAC         | 20   | 234    |
| F2012       | TACAGGGGATCATTTTCGGA         | 20   | ACGAATTACGGCTTGGTCAC         | 20   | 236    |
| F2013       | CATGTAGCTCAGCTCCCCTC         | 20   | ATAGTCCACTGCAAGATCAGATT      | 23   | 210    |
| F2014       | AGGTCCATCAACATTCCTGC         | 20   | GTTGGTGGTCGGTCTTTGTT         | 20   | 280    |
| F2015       | TCGTTTTCGAAAGGGTTTTG         | 20   | GCATTGGATGAGTTACGGCT         | 20   | 223    |
| F2016       | AAGGATCCCCAGTCGATTT          | 20   | TTTCACTTGCCTCGTAGTCG         | 20   | 218    |
| F2017       | TCTACACAGCCCTACTCGCC         | 20   | GCTTGGTCTGAGAGGAGTGG         | 20   | 251    |
| F2018       | CTTTGTGGCCTTTCATCGAG         | 20   | CTGCTTCCTCTTCCCCTTT          | 20   | 216    |
| F2019       | CCTCTCCTTACACGGGGATT         | 20   | TTGATTATGCTTTGGAGGGG         | 20   | 242    |
| F2020       | CTGGTCCGAGTGGAAGAGAG         | 20   | CTCAGTCAGCCCGTCCATAC         | 20   | 233    |
| F2061       | GGGATCGTTTTTGGAAAGGT         | 20   | GTCACGGAATTGGACGAGTT         | 20   | 248    |
| F2062       | CGTTCTCCGTTGAGAGGAAG         | 20   | CCTATCGATTGTCCATTGCC         | 20   | 206    |
| F2063       | GCAGTAGTTAGGGCAGGCAC         | 20   | GGCCTAGTAGCTGCTGGATG         | 20   | 210    |
| F2064       | TGAAAAACGAAGGGGATCTG         | 20   | GATGCGTGGGTGTGGTGT           | 18   | 227    |
| F2065       | TTAAAGCAACCCCGACCTT          | 20   | GCGTTTGGAAATTTTGTAAATCA      | 21   | 201    |
| F2066       | AATCCCATCAACTGTCGCTC         | 20   | GCTAGCAATGCTGTCATGGA         | 20   | 216    |
| F2067       | CGTTCTCCGTTGAGAGGAAG         | 20   | CAGGCGTCTACTCGATTGT          | 20   | 222    |

Table S2. Cont.

| Primer Name | Forward Primer 1 (5'-3') Seq | Size | Reverse Primer 1 (5'-3') Seq | Size | Length |
|-------------|------------------------------|------|------------------------------|------|--------|
| F2068       | TGAGATTGGCATCAAGCAAG         | 20   | TTTCTGGTCAGTTCGGTCAG         | 20   | 287    |
| F2069       | AGCGATATGTCCTCCAATGC         | 20   | GGTAGTCGTTCTTGTCTATCTTTGT    | 25   | 240    |
| F2070       | CTCCTCCTCATAAAACCCCC         | 20   | GTCTCCTCCCTCCCTCCTC          | 19   | 213    |
| F2071       | TGGAGAGAAAGTCAATGGGG         | 20   | AGTACATTGTCTGGGAGTCGG        | 20   | 223    |
| F2072       | TGCTTCATGTGCATGGATTC         | 20   | CCACTCCCTTCTCGGAAAGT         | 20   | 236    |
| F2073       | TGGAGAGAAAGTCAATGGGG         | 20   | GAGTCGGTTGTTGAGGTGGT         | 20   | 216    |
| F2074       | GCCACACTAAATAAGCTTTGTGTC     | 24   | TGGTCGTCACTGATTACGGA         | 20   | 236    |
| F2075       | AAACGATTTGTCACGGGAAG         | 20   | AGGGGGACGAACTTCTTCAT         | 20   | 263    |
| F2076       | CGAAGCATGTTACTCCCCAT         | 20   | AACATAGGTGGGTGGTGGG          | 19   | 225    |
| F2077       | AATTGTGCAGATTCCGATCC         | 20   | TTTGTCTGAGCAACTGGAAGA        | 20   | 224    |
| F2078       | GCATGGGCTTGTTCCTCAAAT        | 20   | CATTTGGGGTAGTGGAGTGG         | 20   | 240    |
| F2079       | ATGACGAAGCCTCTGAGCAT         | 20   | AGACATGCGCAAACACTAGCAC       | 20   | 221    |
| F2080       | CGGGAAGCAAATGTTTCAGAC        | 20   | ACTTCTTCATCTGCACCGCT         | 20   | 241    |
| F2181       | GAAAAGGACTGACAGAGCCG         | 20   | CCCTCCGTCGTTCCCTT            | 18   | 244    |
| F2182       | CAGTTCAGTGCAGTGCAGGT         | 20   | CTTCTCCTTCCTTCCTACCTC        | 22   | 229    |
| F2183       | AAATCGACGAACGACTCACC         | 20   | CGCCGACTCTCTCTGTCT           | 20   | 200    |
| F2184       | TGTTTCGAAAGCCAAGAATCC        | 20   | TGGAATCGCGGAATACAAAT         | 20   | 247    |
| F2185       | GAGTTAGAGGACAGCGTGGC         | 20   | TGCAGCAGAGAATGTGCTACT        | 21   | 210    |
| F2186       | TAGCCCGTAGTGCTCCAAC          | 20   | CACAAGATGGCACGGTTCTA         | 20   | 214    |
| F2187       | CGATTGCACACACGGATAAC         | 20   | GTCGTTGTGCTTGCCTTGT          | 20   | 289    |
| F2188       | TTGATGGGATCAAGAGGAGG         | 20   | AGCAGCCGACGTGTTTTACT         | 20   | 242    |
| F2189       | ATTCATGGCACTGGTTCTC          | 20   | CCTCTCTACTTTTTCTTCGTCA       | 23   | 252    |
| F2190       | ACCATGAACAAAAGCAGGG          | 20   | CTTCTCCTTCCCGGACCTC          | 19   | 217    |
| F2201       | CCACCTCGGAGAGGTTGATA         | 20   | TCTGACTCCACCGATTTTCC         | 20   | 279    |
| F2202       | GTCCTCACCTCCTTTTGGGT         | 20   | CCTTCGTTTCTCTCTCGTCG         | 20   | 250    |
| F2203       | ACGGAAGGAAGAAAGGTGGT         | 20   | GGCCCTCGCCTTACTTAGTC         | 20   | 206    |
| F2204       | CACCACACCACCTACGTGAC         | 20   | GATAGGGGATCCGGAGTCTG         | 20   | 240    |
| F2205       | AAGCAGTTGCAGCAGTAGCA         | 20   | TCGTCTCTCGTTAGGTTCCG         | 20   | 207    |



Table S2. Cont.

| Primer Name | Forward Primer 1 (5'–3') Seq | Size | Reverse Primer 1 (5'–3') Seq | Size | Length |
|-------------|------------------------------|------|------------------------------|------|--------|
| F2206       | GGCCTAACGGGAGTTAAAGG         | 20   | TGCAGCAGAGAATGTGCTACT        | 21   | 230    |
| F2207       | GGTTACTCCTGCTGGCTCTG         | 20   | CGTTCGTCTTCCTTCTCGTC         | 20   | 215    |
| F2208       | CACGACAGTCGAGTTCCTCA         | 20   | GCTTGTCCACGCAAGTACG          | 19   | 252    |
| F2209       | GGAACCAAGAAAACCCCAAT         | 20   | GTACGTCGAACGAAGACGAC         | 20   | 236    |
| F2210       | CTTCGCTCGTTTTCAACTCC         | 20   | GACTGCAGAGCACGGGAC           | 18   | 206    |
| F2281       | TTCTCCGTCAGCTCACATTG         | 20   | TCCATTGTTCATTTAGTAGAAACCT    | 25   | 251    |
| F2282       | ATTGGACGAGTTACGGCTTG         | 20   | TATGCCACGAGTCAATCTG          | 20   | 224    |
| F2283       | CGTGTGCGGTACCCTACTT          | 20   | TCCATGCACAACCTAGCTGGA        | 20   | 205    |
| F2284       | CTACGGAAGAGAGTGGCAGG         | 20   | TATCCACCAACGTGGGATTT         | 20   | 221    |
| F2285       | TCTTGTTCTGTACAGTTTGTATGGG    | 25   | ACCATTGGCCGATATTACCA         | 20   | 211    |
| F2286       | GCTAATCACGCGATCAGACA         | 20   | TCCCTTCGTACCCCTTTC           | 19   | 226    |
| F2287       | CGTGTGCGGTACCCTACTT          | 20   | TAGCTCACGGCACAACCTAGC        | 20   | 210    |
| F2288       | GACCCAGCGATCAGTCTCTC         | 20   | CTCTTGTCGTCTTGGTCCGT         | 20   | 201    |
| F2289       | CCAACATAGTGTCATTGCGTG        | 21   | GAGGCCCGTTTCGTTATGTC         | 19   | 243    |
| F2290       | GACCCAGCGATCAGTCTCTC         | 20   | GACCTCACCTCTTCGTCGTC         | 20   | 215    |
| F2301       | GCCATCGATCACCAGCTTAT         | 20   | CGGACGACGACTAGCAGAC          | 19   | 204    |
| F2302       | ATTCTCAGGGTGTGCGTGAT         | 20   | GGGCGACGATACCCTACTAC         | 20   | 265    |
| F2303       | GCATGCCCTGTATGATTG           | 20   | CACACAAGAGCGTGGAGGTA         | 20   | 242    |
| F2304       | GCGGTACCCTACTTGTGGA          | 20   | TCCACTAGCTCACGCACAAC         | 20   | 221    |
| F2305       | CGCACTAGCCCTTGTCTTTC         | 20   | CGCCCTACGAACAAATCACT         | 20   | 225    |
| F2306       | TAGTTGATGCGTCTCGTGCT         | 20   | GTCGGCGAGACTCCCTACTC         | 20   | 237    |
| F2307       | AGCTGTGGAAGAACGGAAGA         | 20   | TCAGAACTAGCGCAACAATGA        | 21   | 224    |
| F2308       | AAAAATTTGGCCTCACATGC         | 20   | CCGGTTTACGGTACACGACT         | 20   | 239    |
| F2309       | AAAAATTTGGCCTCACATGC         | 20   | CGGTTAACGTACGAACCTACGG       | 21   | 245    |
| F2310       | CCGCATATGCATACGTCAAG         | 20   | CCGACTGTCTAGGTCTGTGCT        | 20   | 215    |
| F2361       | TCACGCTTTCCTTATTTGG          | 20   | TCCGGTTTTTAGCCACGAGTC        | 20   | 194    |
| F2362       | CCATTCCAGCAGATTTTCGAT        | 20   | CAGGTTGGAAGCATAGGTGG         | 20   | 220    |
| F2363       | GACCCCCGCCTTTTTAGTAG         | 20   | TGTTACGATGATGCGGCTTA         | 20   | 202    |

Table S2. Cont.

| Primer Name | Forward Primer 1 (5'-3') Seq | Size | Reverse Primer 1 (5'-3') Seq | Size | Length |
|-------------|------------------------------|------|------------------------------|------|--------|
| F2364       | CTTCTTGATGGAAGCGAAG          | 20   | ACCTGTTCTTGCCATTACCG         | 20   | 277    |
| F2365       | GTGGAGCTGCGGTACTTTTC         | 20   | CAGCACATGAAAAGAAGAGATAGA     | 24   | 252    |
| F2366       | CGCTTCTATCACCTCTTCCG         | 20   | GCATTCCTTTATAGCTGCGG         | 20   | 260    |
| F2367       | TCTCTGGGAAGTTGTTTCAGGA       | 21   | TGACGCGGTTAGTCAAAATG         | 20   | 207    |
| F2368       | TCACGCACTACCTCTCTCTCC        | 21   | TGAGTGATTGTGTGTGAGGG         | 20   | 190    |
| F2369       | AGAGAGGGGGCTGGTTGTAT         | 20   | AACCATACGGAGGACACGAG         | 20   | 203    |
| F2370       | CCAAGTCCCAAGGTTTTTCA         | 20   | GAGAGAGAGAGGCGTGTGCT         | 20   | 252    |
| F2381       | TGTGTGTCCGTGTCTGTGTC         | 20   | TGCTTGATTCTTGAAGGTGG         | 20   | 295    |
| F2382       | CAACAAGGTTGGTTGGCTTT         | 20   | ATGCTGCTGCAGATGTTTTG         | 20   | 165    |
| F2383       | CCCCTACTCCCGTGAAACTT         | 20   | TGTCAACGTATGCGTGTGTG         | 20   | 162    |
| F2384       | GACGGTAGCCATGGTCTGAT         | 20   | ATCCAGAAGCCGGGTAAGTT         | 20   | 230    |
| F2385       | GTCAACTCATCATCCCACCC         | 20   | CATGTGTCGTCACTTTTGGG         | 20   | 279    |
| F2386       | GGCTCCACTTCCTCCTCTTG         | 20   | TCTCGGCAACAGAACTCT           | 20   | 253    |
| F2387       | GAAAGCTGGCTGAACAGGAC         | 20   | AGTTTGATCATAGGCCACCG         | 20   | 196    |
| F2388       | GATAGCCTGCCTGATTGGTG         | 20   | AAGGCTTAGGCCCATCAAGT         | 20   | 263    |
| F2389       | TCCACAGTCAGAGTTGGCAG         | 20   | AAATACATGTCACTCGCCCC         | 20   | 236    |
| F2390       | CCCAATGCAAGTGAGATGTG         | 20   | GGGGTTTCGATCTGGATTCT         | 20   | 227    |
| F2531       | TTGTTCTCTGCAGGTCGATG         | 20   | TCTCACGGTTACGTGTCCAG         | 20   | 247    |
| F2532       | AATGTCACAGGTTTCCCTCG         | 20   | GCTGACGCTTGTGTTGTGTT         | 20   | 177    |
| F2533       | AAGGCTTAGGCCCATCAAGT         | 20   | GATAGCCTGCCTGATTGGTG         | 20   | 278    |
| F2534       | AAATCTTCACACCCAGCACC         | 20   | ACCTTGTATTGCACCTTGCC         | 20   | 257    |
| F2535       | TCATTCCACCAACGAATTGA         | 20   | AATCTTCGAACGCGACTTGT         | 20   | 188    |
| F2536       | ACCATTGGCCGATATTACCA         | 20   | AAAAGATTGGCTCGTGGTTG         | 20   | 267    |
| F2537       | TACTCCAGTGTGTTGGGCA          | 20   | TCTTTGGTGCAGAAGATGGA         | 20   | 196    |
| F2538       | CAGTGTGAGCTCGAAGATGC         | 20   | ACGGAAGGGAACGACTGAC          | 19   | 235    |
| F2539       | TGAATCTCCAAGCTGCAATG         | 20   | CCGTGGAATGGTCTCTAC           | 20   | 197    |
| F2540       | TATTCGAGCCCCATTTCTTG         | 20   | GCGTTATCCGGATGATGAAG         | 20   | 184    |
| F2551       | TATTCGAGCCCCATTTCTTG         | 20   | AGCGTATCCGGATGATGAAG         | 20   | 185    |

Table S2. Cont.

| Primer Name | Forward Primer 1 (5'-3') Seq | Size | Reverse Primer 1 (5'-3') Seq | Size | Length |
|-------------|------------------------------|------|------------------------------|------|--------|
| F2552       | AAACACAAGCCGAATTGTCC         | 20   | CTGAGGTGTCTCTTGCCCTC         | 20   | 190    |
| F2553       | TTAACCGAACAAGGAGTGGG         | 20   | ATTGGACGAGTTACGGCTTG         | 20   | 198    |
| F2554       | GCCCAAAAACCTCATTCTCCA        | 20   | GCACATATGTTTGTGCAGGG         | 20   | 171    |
| F2555       | GGGAACACGAACACATGGTA         | 20   | TGTATGTCTCCTGTTATGCGG        | 21   | 176    |
| F2556       | AAAGCAAGAAGGTCCGAGGT         | 20   | CGGCGGCAATTATCTTGTAT         | 20   | 237    |
| F2557       | AAAAGGCAGCTGAGCATCAT         | 20   | GCCCTTTCGTCTCTGTTTTG         | 20   | 192    |
| F2558       | GAGACGCCTTTCTCAACCAG         | 20   | TGTCTCGTCTTCTCCGATCC         | 20   | 186    |
| F2559       | TGCTCTAGTTGCAGTGGTGC         | 20   | GGAGGGCATTGTACTGGAGA         | 20   | 162    |
| F2560       | GAAGGTAGCCACCCTCTTCC         | 20   | GTCTCTTGGGTGTGCACTGA         | 20   | 295    |
| F2731       | CGTTCCTCCGTTGAGAGGAAG        | 20   | AGGCAAGTCATCCTTGGCTA         | 20   | 235    |
| F2732       | TCCAAAACATTGAGTGGGGT         | 20   | ATTGGACGAGTTACGGCTTG         | 20   | 194    |
| F2733       | ACCCCATCCTTTCTCCAAAT         | 20   | TCTCCTCACTTTCGATGGCT         | 20   | 288    |
| F2734       | CACACAGATATTTGGCACCG         | 20   | TGAGGATCCGAAAAGATTGG         | 20   | 216    |
| F2735       | GCATGGGCTTGTTTTCAAAT         | 20   | ATTGGACGAGTTACGGCTTG         | 20   | 256    |
| F2736       | CTCTATCGACCGCATGTGTG         | 20   | CCAGCTTATCAGCCACTGGT         | 20   | 162    |
| F2737       | TTTGGTTGGTTGGATGGATT         | 20   | TCGTAGGGTGAAGCGACTCT         | 20   | 196    |
| F2738       | GCAGTTTTGTTTCGATCGGT         | 20   | GCATGGTTTGTACTTGGC           | 20   | 275    |
| F2739       | ATACCCGAAGCATTGAGTGG         | 20   | TGTTTGGGTCGAAGAATAGTCA       | 22   | 171    |
| F2740       | AGCTTTGGCATGGGATTATG         | 20   | AACAGGTAGTCATGCGTGTGTC       | 22   | 182    |
| F2781       | ACGTAGCATTTCGGTTTGG          | 20   | GGATTTGTGCCGTGTATGTG         | 20   | 298    |
| F2782       | GCCGGAGTATAGATCCGACA         | 20   | GTCAGGCCGTGAACGTTATT         | 20   | 175    |
| F2901       | ATGCACGCACGAACACATA          | 19   | TCTTGATCATCACCAGCACC         | 20   | 280    |
| F2902       | ATTGTGCTCACCTACGCCTC         | 20   | GCTACTCCCATAGCCCCTTC         | 20   | 198    |
| F2979       | CACCATGTGTATGCGTGTGA         | 20   | GGAGAGGAGCTTTCAGAACCA        | 21   | 234    |
| BM114       | ATCGTAGAAAACATTGGCCC         | 20   | TGACCCATGGACACTTTTCA         | 20   | 279    |
| BM136       | AATGTCACAGTTTCCCTCG          | 20   | GCGAGAAAGAGGAGAGGGTT         | 20   | 225    |
| BM212       | TATAGCCTCACCGCTCGTCT         | 20   | GGCCTGAAAACCTCAAATGGA        | 20   | 206    |
| BM289       | TGGGACAATATGGCAAGGTT         | 20   | ACAAATGCCTGATGGTAGGC         | 20   | 237    |

Table S2. Cont.

| Primer Name | Forward Primer 1 (5'-3') Seq | Size | Reverse Primer 1 (5'-3') Seq | Size | Length |
|-------------|------------------------------|------|------------------------------|------|--------|
| BM295       | CACACAGATATTTGGCACCG         | 20   | TGAGGATCCGAAAAGATTGG         | 20   | 214    |
| BM306       | ATTTTCTGGGCAATTCAACG         | 20   | GTCCTCATCCCTTCCCTCTC         | 20   | 191    |
| BM341       | GTGAAGAACTCTCGATCGGC         | 20   | ACTGGGTAGTACACGGCGAG         | 20   | 305    |
| BM344       | AGCACTGAGGCACAATTCCT         | 20   | GTGCTGGGGTTTGTGACTTT         | 20   | 231    |
| BM374       | CTACCGCTTCAAAACGAAGG         | 20   | TGTCCCACTCTCCTACCTACTACC     | 24   | 178    |
| BM375       | CCAGCGTTAATCATCTCGGT         | 20   | CACCCACTTCGACCCAAC           | 18   | 202    |
| BM377       | CGAGCAGCAGTTCTCAAGTG         | 20   | TCCTTCGGTTCGTTCTATGC         | 20   | 171    |
| BM378       | ATGGGATGCACAGGTACACA         | 20   | TCCTTAGGTCATCGTCCTATTTG      | 23   | 260    |
| BM379       | ACAGAATGGCTACCTCCCT          | 20   | GGGCGTAACCGTTAAACCTA         | 20   | 214    |
| BM395       | AGGCGGCTTAAAAATCCTGT         | 20   | TCTCCATGCAAGCAATCAAG         | 20   | 239    |
| BM396       | TTGATTATGCTTTGGAGGGG         | 20   | CCTCTCCTTACACGGGGATT         | 20   | 248    |
| BM397       | TTCCGGTTACAGACGGTAGG         | 20   | TCTTGTGACGTTCTGCCAAG         | 20   | 194    |
| BM411       | GACCCAGCGATCAGTCTCTC         | 20   | TTGTCGTCTTGTCGTCG            | 18   | 198    |
| BM412       | AAAAATTTGGCCTCACATGC         | 20   | CCGGTTTCGTACAGACTGGT         | 20   | 233    |
| BM481       | TATATGGGCTGCACGAGGTT         | 20   | TTCTCTGCAACGACATACGC         | 20   | 264    |
| BM482       | CTGCCTTCTCCTTGCAGTTG         | 20   | GGTTAAGAGCCCCCTTTTTG         | 20   | 259    |
| BM483       | GACCAGAGACTTGGGCTTTG         | 20   | TCACTCACTCACTCATCCGC         | 20   | 243    |
| BM484       | GGACAGGATGAGGAGGATCA         | 20   | CGGTTACCATCGCCTTCTTA         | 20   | 235    |
